# Supplementary material for: Plexin-Semaphorin Signaling Modifies Neuromuscular Defects in a Drosophila Model of Peripheral Neuropathy
Source: PubMed Central journal article supplement (PMC5827687; doi:10.3389/fnmol.2018.00055), 2018-02-22
Supplement: Image_1.pdf [file Image_1.pdf]

# **Plexin-semaphorin signalling modifies neuromuscular defects in a *Drosophila* model of peripheral neuropathy**

Stuart J. Grice<sup>1</sup>, James N. Sleight<sup>2</sup>, M. Zameel Cader<sup>1,3\*</sup>

## **Affiliations:**

<sup>1</sup> MRC Functional Genomics Unit, Department of Physiology, Anatomy and Genetics, University of Oxford, South Parks Road, Oxford OX1 3PT, UK.

<sup>2</sup> Sobell Department of Motor Neuroscience and Movement Disorders, Institute of Neurology, University College London, London WC1N 3BG, UK.

<sup>3</sup> University of Oxford, Nuffield Department of Clinical Neurosciences, John Radcliffe Hospital, Oxford OX3 9DU, UK.

\* Correspondence to: M. Zameel Cader

Email: [zameel.cader@ndcn.ox.ac.uk](mailto:zameel.cader@ndcn.ox.ac.uk)

Tel: +44 (0) 1865 231858

Fax: +44 (0) 1865 272420

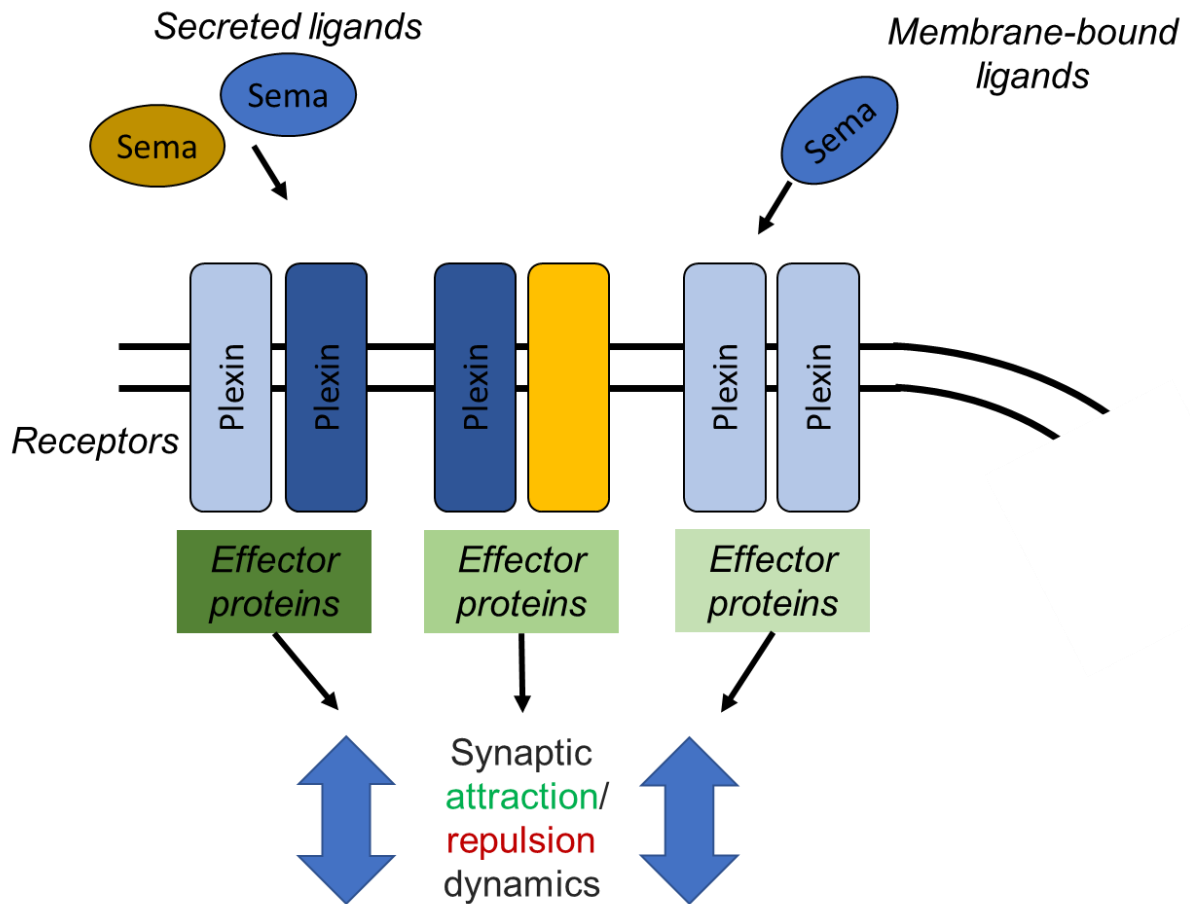

**Figure S1. Plexin-semaphorin signalling.** In vertebrates and invertebrates, plexins are transmembrane receptors that bind to secreted and membrane-bound semaphorins. Plexins act in conjunction with co-receptors, such as neuropilins (yellow protein), to drive signals that mediate repulsive and attractive cues at the synapse. The collaboration of different combinations of ligands, plexins, co-receptors, and downstream effector proteins impact the dynamics of axonal attraction and repulsion.

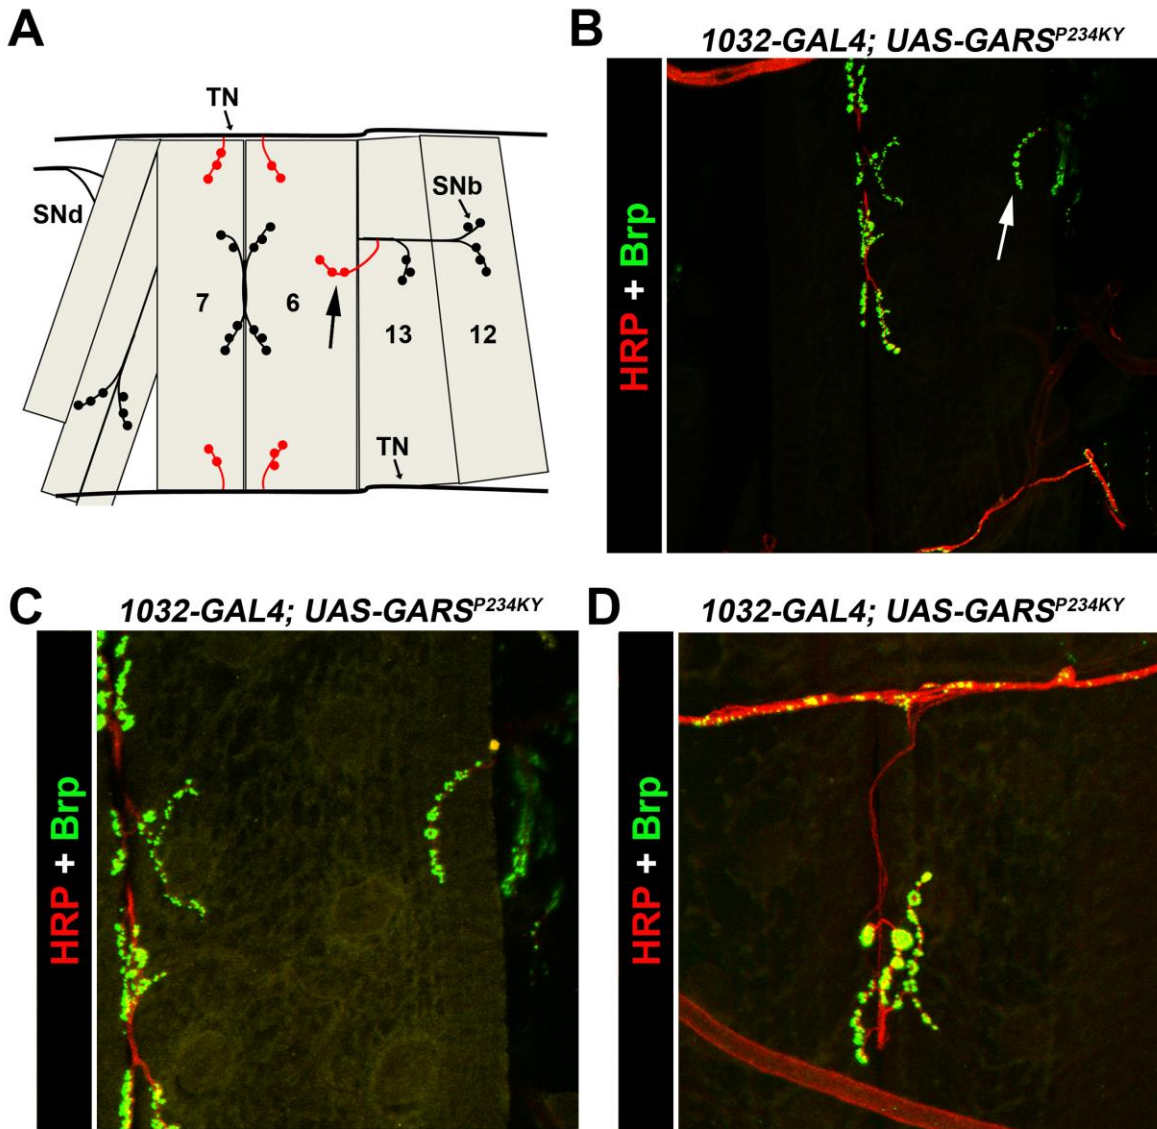

**Figure S2. Ectopic synaptic contacts from segmental nerve b in mutant *gars* flies.** (A) Schematic of the larval ventral body wall muscles in one hemisegment, showing the transverse nerve (TN), and branches of segmental nerves b (SNb) and d (SNd). The ectopic synaptic contacts often observed on muscles 6 and 7 in *gars*<sup>P234KY</sup> flies are shown in red. This schematic is the same as in Fig. 1A. (B) Ubiquitous expression (*1032-GAL4* driver) of mutant *gars* leads to ectopic synaptic contacts from the SNb onto muscle 6. Large arrows in both panels highlight ectopic branches of the SNb. (C-D) Zoomed images of the ectopic axons and synaptic contacts observed from the SNb (C; zoom from B) and the TN (D; zoom from Figure 1C) when *gars*<sup>P234KY</sup> is expressed ubiquitously, Scale bars = 10  $\mu$ m

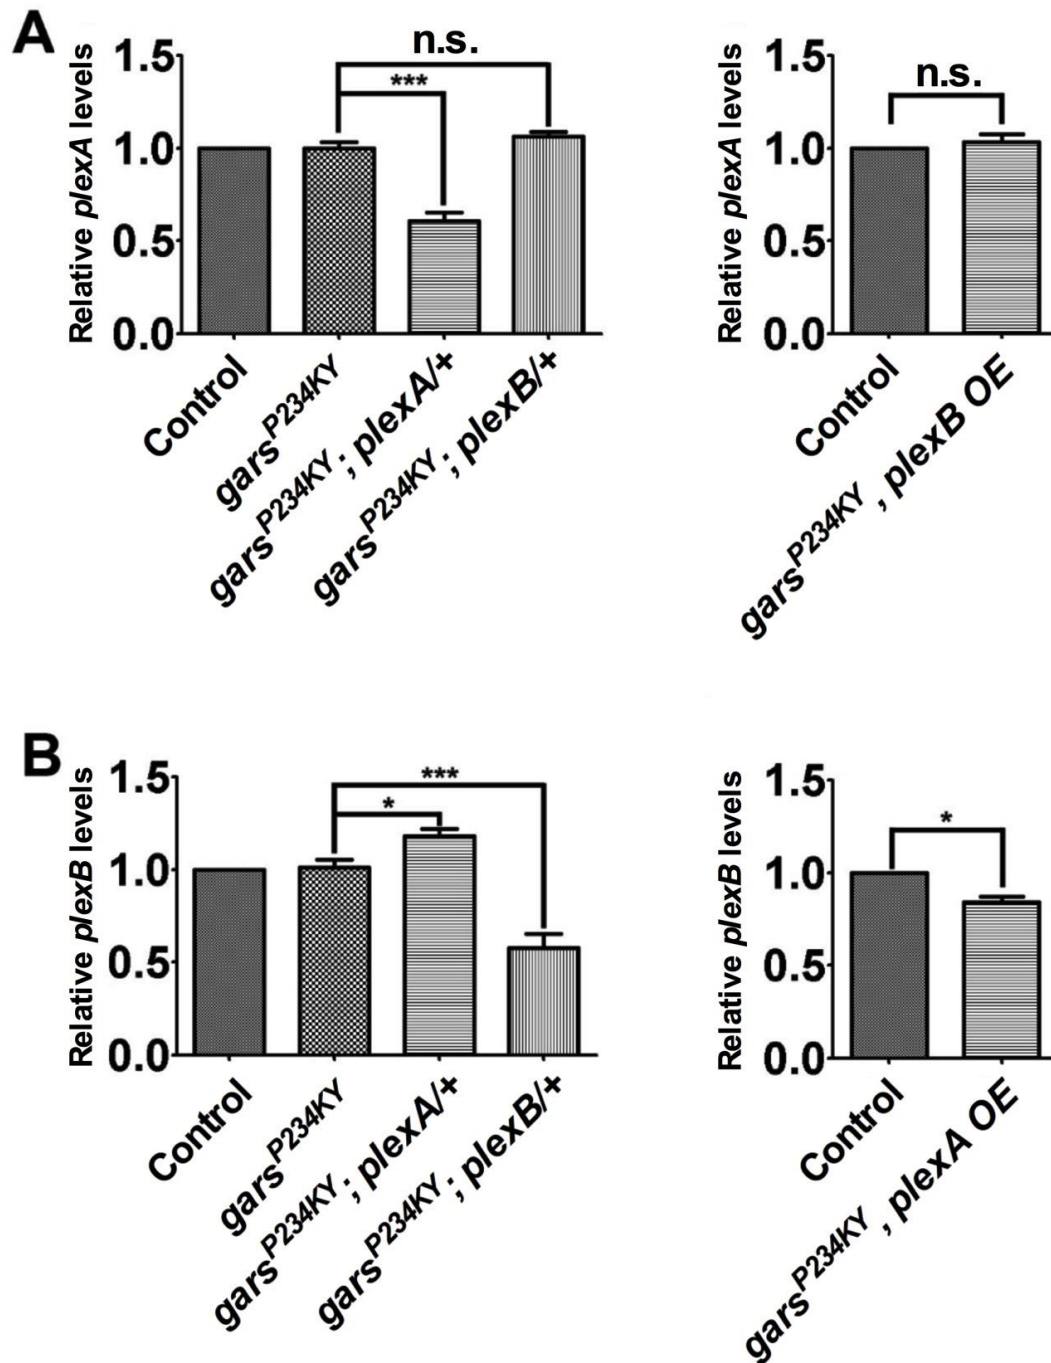

**Figure S3. *plexA* and *plexB* expression in GlyRS-plexin interaction mutant *Drosophila* backgrounds.** (A, B) qPCR analyses of *plexA* (A) and *plexB* (B) expression in larval ventral nerve cords. Ubiquitous mutant *gars* expression has no impact on *plexA* or *plexB* RNA levels (A, B, left). *gars*<sup>P234KY</sup> flies on a heterozygous *plexA* background have the expected reduction in *plexA* expression, while *plexA* levels remain constant in *gars*<sup>P234KY</sup>; *plexB*/+ flies (A, left). In contrast, *plexB* levels are significantly increased in the *gars*<sup>P234KY</sup>; *plexA*/+ flies (B, left). Accordingly, overexpression of *plexB* has no effect on *plexA* levels (A, right), whereas *plexA* overexpression leads to a reduction in *plexB* (B, right). *rp42* was used as the reference gene. \*  $P < 0.05$ , \*\*\*  $P < 0.001$  Dunn's/Bonferroni's multiple comparison test (left panels) or *t*-test (right panels). n.s., not significant.

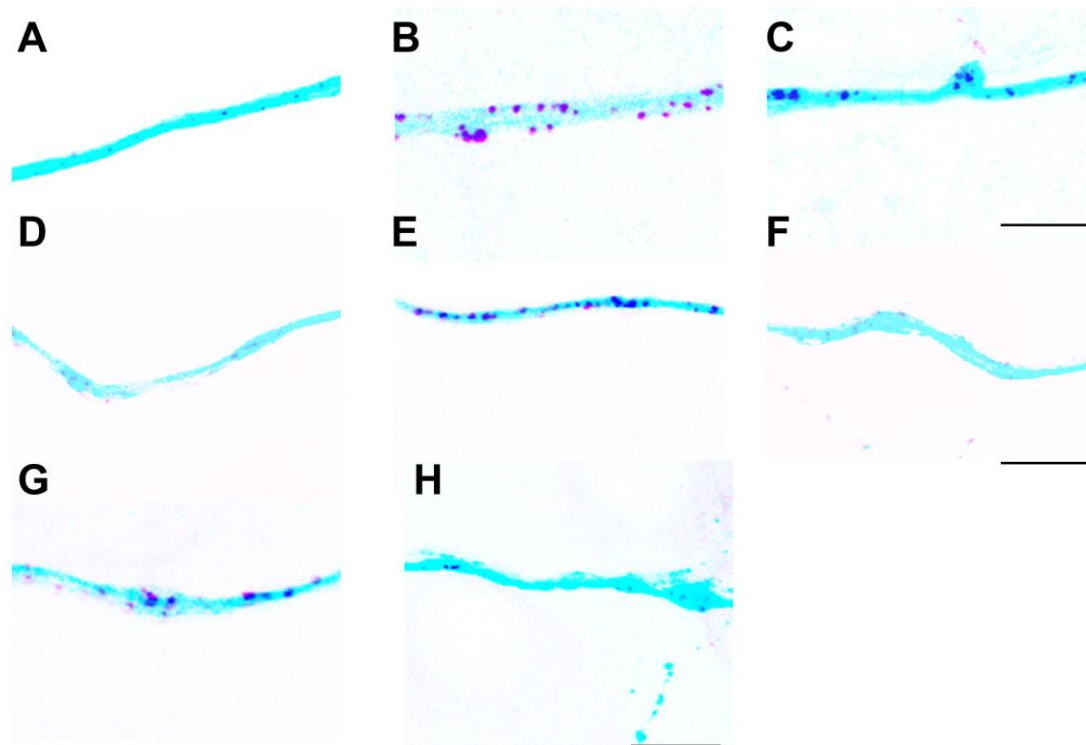

**Figure S4 *plexA* and *plexB* dosage changes modify GlyRS<sup>P234KY</sup>-associated Brp axonal localisation.** (A-C) Zoomed images of the TN showing increased axonal Brp compared to control (A; zoom from Figure 3A) upon ubiquitous (B; zoom from Figure 3B) and muscle-specific (C; zoom from Figure 3C) *gars*<sup>P234KY</sup> expression. (D-G) Representative images showing axonal Brp in mutant *gars* expressing flies with *PlexB* reduction (D), *PlexB* overexpression (E), *PlexA* over expression (F), *PlexA* reduction (G), and *Sema2a* and *gars*<sup>P234KY</sup> expression (H). Scale bars = 10 μm.
